# Supplementary material
Source: publisher figshare collection journal article supplement (https://gsapubs.figshare.com/ndownloader/files/27492215)
Supplement: Supplementary file 1 [file 27492215]

Davies, R.J., et al., 2021, Climatically driven instability of marine methane hydrate along a canyon-incised continental margin: Geology, v. 49, https://doi.org/10.1130/G48638.1

TABLE S1. CLIMATE MODELS

| **Climate Model** | **URL** |
| --- | --- |
| CCSM4 | https://www.cesm.ucar.edu/models/ccsm4.0/ccsm_doc/c31.html |
| GISS-E2-R | http://www.glisaclimate.org/node/2226 |
| MPI-ESM-P | https://portal.enes.org/models/earthsystem-models/mpi-m-1 |
| IPSL-CM54-LR | http://cmc.ipsl.fr/ipsl-climate-models/ |
| CNRM-CM5 | http://www.umr-cnrm.fr/spip.php?article126&lang=en |
| MIROCESM | http://www.glisaclimate.org/model-inventory/university-of-tokyo-nationalinstitute-for-environmental-studies-and-japan-agency-for-marine-earth-0 |
| MRI-CGCM3 | http://www.glisaclimate.org/model-inventory/meteorological-research-institute-cgcmversion-3 |
| FGOALS | [https://pcmdi.llnl.gov/ipcc/model_documentation/FGOALSg1.0.htm](https://pcmdi.llnl.gov/ipcc/model_documentation/FGOALS-g1.0.htm) |
